# Supplementary material
Source: PubMed Central journal article supplement (PMC6408613)
Supplement: rspb20182023supp1.pdf [file rspb20182023supp1.pdf]

# Supplementary materials

## Background information on study area and species

South Africa is located at the oceanographic interface between the Atlantic and Indian Oceans, and the number of species recorded particularly along its southern coastline is greater than that of either the south-eastern Atlantic or the south-western Indian Ocean [1]. While this can be partly explained by the fact that the fauna of the two oceans overlaps in South Africa, there is also evidence for large numbers of endemic species [1,2]. Many of these are genetically subdivided and may comprise complexes of evolutionary lineages that represent cryptic or incipient species [3], suggesting that the region's true biodiversity may be much greater than is presently acknowledged. The boundaries between the ranges of many of these lineages coincide with one of the region's four temperature-defined marine provinces, namely the cool-temperate west coast, warm-temperate south coast, subtropical east coast and tropical north-east coast [3], and some species even have ranges that are limited to the transition zones between these provinces [4,5]. However, there are also numerous species in which the range of a particular evolutionary lineage spans multiple marine provinces (Fig. 1). In some species, the amount of gene flow between provinces can be considerable when conditions are favourable, but the migrants are unable to establish themselves in the long term [6,7]. Physiological studies indicate that for some species, sister lineages present in adjacent provinces exhibit distinct temperature preferences [8,9], which suggests that thermal adaptation contributes towards limiting gene flow between biogeographic regions by reducing migrant fitness and, if a conspecific sister lineage is present, by subjecting the migrants to competitive exclusion [3]. The Knysna sandgoby, *Psammogobius knysnaensis* (species 13 in Fig. 1), is one of the most common estuarine fishes in South Africa [10,11]. It has sedentary adults, so connectivity among populations is likely facilitated by its planktonic

27 larvae, which are transported out of estuaries in large numbers during ebb-tides [12] and use  
28 nearshore areas as nurseries [13]. Although the species' planktonic larval duration is not  
29 known, it is likely similar to that of other gobies, which is in the order of weeks to months  
30 [14,15]. Compared to the other candidate species with similarly wide distributions, the purity  
31 of its extracted DNA, which was extracted using the CTAB protocol [16], was much higher.  
32 Based on DNA sequence data from the mitochondrial COI gene and the nuclear S72 intron,  
33 the species exists as a single lineage whose range spans the west coast, the cool-  
34 temperate/warm-temperate transition zone on the south-west coast, the south coast and the  
35 warm-temperate/subtropical transition zone on the southern east coast [17]. Although genetic  
36 structure was identified between the west coast (site 1 in Fig. 1) and all other regions on the  
37 basis of mtDNA, this is not a result of divergent evolution (Fig. 3b), but of lower genetic  
38 diversity on the cool-temperate west coast [17].

39

## 40 Supplementary methods

41

### 42 Processing of raw sequences

43

44 Raw sequences were processed using the `process_radtags.pl` script in STACKS 1.19 [18,19].

45 Briefly, we eliminated reads with ambiguous barcode and/or restriction site, allowing a

46 maximum of two mismatches, and all remaining reads were trimmed to 80 bp by removing

47 the barcode, the restriction site, and the last 8 bp. The dDocent 1.0 software pipeline [20] was

48 then used to remove low quality bases using a quality score limit of 30. Putative RAD reads

49 were identified *de novo* using a minimum depth of 15×, and the selected unique reads were

50 then aligned with a maximum of 8 mismatches to form reference contigs. The reference

51 contigs were then clustered based on an 80% similarity threshold. Single nucleotide

52 polymorphisms (SNPs) were called from the aligned good quality reads of multiple

53 individuals, using a Bayesian-based variant detection approach [21]. After excluding

54 individuals with >20% of missing data, the final data set comprised 109 individuals. Variants  
55 were filtered to produce a file containing only the best quality biallelic SNPs per locus, which  
56 were present in at least 80% of the individuals sequenced, with a minimum allele frequency  
57 equal to or greater than 3% (please see Table S4 for additional detail).

58

### 59 **Identification of loci under thermal selection and neutral loci**

60 The contribution of coastal sea surface temperature (SST) to the overall pattern of genetic  
61 differentiation was assessed using a spatially explicit generalized linear mixed model to test  
62 for direct associations between SNP allele frequencies and temperature-related variables,  
63 while controlling for the effects of spatial structure and shared population history,  
64 implemented in the R package gINLAnd [22]. Unlike  $F_{ST}$ -based outlier scans, which identify  
65 loci on the basis of population information [23], the identification of loci in in genotype-  
66 environment association methods such as gINLAnd is thus not influenced by any regional  
67 population structure [24]. Briefly, gINLAnd estimates the covariance associated with the  
68 spatial distribution of the samples and a locus-specific effect of each environment variable; it  
69 then estimates the likelihood of two competing models: a model with the environmental  
70 effect and a reduced model without the environmental effect. Finally, gINLAnd assesses the  
71 strength of genetic dependence on the environmental variable by computing a Bayes factor  
72 between the two models. To avoid false positives, we used a conservative approach in which  
73 only those loci which showed a log Bayes factor (BF)  $\geq 10$  were considered to be under  
74 selection (a log BF > 4.6 is considered decisive [25]). A plot depicting loci under selection is  
75 shown in Fig. S1. We calculated a multidimensional scaling projection of the coastal distance  
76 between sampling sites using the R package MASS 7.3 [26], which is more meaningful than  
77 using the original geographic coordinates because this would have required connecting sites  
78 via terrestrial habitat.

79

80 To identify selectively neutral loci, the following approach was used. Thermal selection may  
81 be only one of a number of drivers of selection, so we used BayeScan v. 2.1 [23] to identify  
82 markers under selection on the basis of outlier scans rather than temperature data. This  
83 method was used because it has a low error rate compared to other tests for the detection of  
84 outlier loci [27]. Default settings were applied with prior odds set to 10, but a very high false  
85 discovery rate of 20% was applied to create a neutral data set with a low probability of  
86 containing any remaining loci under selection. We then excluded 304 outlier loci, together  
87 with 27 additional loci identified by gINLAnd that were not found by BayeScan, to create a  
88 data set of 8201 selectively neutral loci.

89

90

## 91 **Temperature data**

92

93 Temperature data originated from sites that are located in close proximity to the estuaries or  
94 lagoons in which samples of *P. knysnaensis* were collected [28] (Table S1). While coastal  
95 SST strongly influences thermal conditions within estuaries that are connected to the sea,  
96 many southern African estuaries become temporarily disconnected from the sea for  
97 prolonged periods of time, and their water temperatures tend to be higher [29]. Moreover,  
98 estuaries exhibit much more extensive variation in physico-chemical characteristics  
99 compared to subtidal nearshore areas, and their biota are considered to be particularly  
100 resilient to cope with this variability [30]. Adult fish in estuaries thus have very wide thermal  
101 tolerance ranges [31], and are unlikely to be under strong thermal selection. In contrast, the  
102 species' planktonic larvae, which emigrate from estuaries [13] and during their marine  
103 dispersal phase will be strongly affected by coastal SST, are likely to be more sensitive to  
104 water temperature because fish larvae have limited metabolic scope and thus limited

105 tolerance to environmental stressors [32]. This suggests that coastal rather than estuarine  
106 temperatures are particularly suitable to explore thermal selection in this species.

107

108 Environmental variables run with the program gINLAnd were taken from Smit et al.[28] and  
109 included minimum and maximum temperatures, as well as the coolest and warmest 5% of  
110 temperature measurements (Table S3). We only report results for minimum and maximum  
111 temperatures as they showed the trends most clearly (Fig. S4) and differed only slightly from  
112 the other temperature readings (Table S1).

113

## 114 **Analyses of genetic structure**

115

### 116 a) Discriminant Analysis of Principal Components (DAPC)

117 DAPC analyses were performed with the R package ADEGENET v. 2.1.0 [33]. DAPC defines a  
118 model with synthetic variables in which the genetic variation is maximized between clusters  
119 of individuals ( $K$ ), and minimized within clusters. We used  $k$ -means clustering and the  
120 Bayesian Information Criterion (BIC) to identify the best-supported number of clusters. We  
121 explored various combinations of maximum or minimum temperature as the environmental  
122 variable with covariance factors that included geographic distance, biogeographic boundaries  
123 and a combination of the two. A simplistic resistance matrix approach [34] was used, where  
124 geographic distance and biogeographic boundaries between pairs of sites were given a  
125 resistance value (one unit of resistance per km between sites and ten units of resistance if  
126 sites were located in different marine bioregions). We then calculated multidimensional  
127 scaling projections based on the resistance pairwise matrices, and these were used as  
128 covariance factor to control for spatial structure. We further explored the effect of using only  
129 SNP data from the coolest and the warmest marine bioregions, using geographic distance as  
130 the controlling factor (see Table S3 for detail on number of SNPs identified).

131

132       b) *fastStructure* analyses

133   The program *fastStructure* uses variational Bayesian inference under a model assuming  
134   Hardy-Weinberg equilibrium and linkage equilibrium, and was primarily used here to  
135   confirm specific results based on DAPC. We used a simple prior and set all other parameters  
136   to the default value, except for the convergence criterion, which was lowered to  $10^{-8}$ . The  
137   programme was run for each value of  $K = 1-9$  independently, and each value was cross-  
138   validated 1000 times. The python script *chooseK* was used to identify an optimal range of  $K$   
139   values, and the resulting barplots were visualised with the R package *distruct2.2* [35].

140       c) BEAST analyses

141   The dataset used for discrete phylogeographic analyses in BEAST comprised data from the  
142   individual alleles of each individual, which were reconstructed in PHASE v. 2.1.1 [36] using  
143   default settings. When more than one pair of haplotypes was possible for an individual, the  
144   one with the highest probability was used. In addition to reconstructing a phylogenetic tree,  
145   this method can infer the most likely bioregion in which each ancestral node in the MCC tree  
146   was present. One hundred million generations were specified, and trees saved every 100 000  
147   generations, and the first 20% of trees were discarded as burn-in. Model and prior settings  
148   followed those recommended in the tutorial available at <http://hpc.ilri.cgiar.org>.

149

150

151 **Supplementary results**

152

153 A total of 405,648,596 raw reads were generated on two Illumina lanes. After demultiplexing  
154 and quality filtering, an average of 1,560,510 reads were obtained per individual, totalling  
155 224,713,440 reads. The filtered catalogue resulted in 8,532 ddRADseq loci containing 15,633  
156 SNPs. A final dataset was obtained by extracting only the SNPs with the best quality score  
157 from each polymorphic ddRADseq locus to remove SNPs that are likely in linkage  
158 disequilibrium. After removing individuals with more than 20% missing data, the final data  
159 set comprised 109 individuals genotyped for 8,532 SNPs.

160

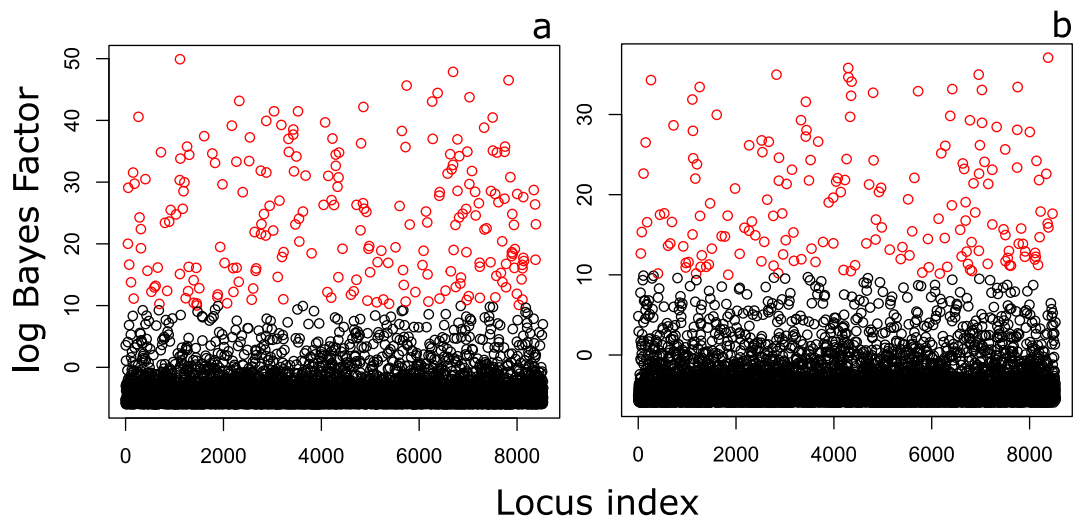

162

163 **Fig S1.** Examples of loci identified as being linked to genomic regions under  
164 thermal selection (red dots) while controlling for geographical distances between  
165 sites by gINLAnd analysis. Plots depict results for (a) minimum temperatures and (b)  
166 maximum temperatures. All log Bayes factors ( $\log BF$ )  $> 0$  indicate potential thermal  
167 selection, and the likelihood that these are false positives decreases with increasing  
168  $\log BF$ . In the loci shown in red ( $\log BF > 10$ ), the association between genomic and  
169 environmental variables is decisive.

170

171



172  
173  
174

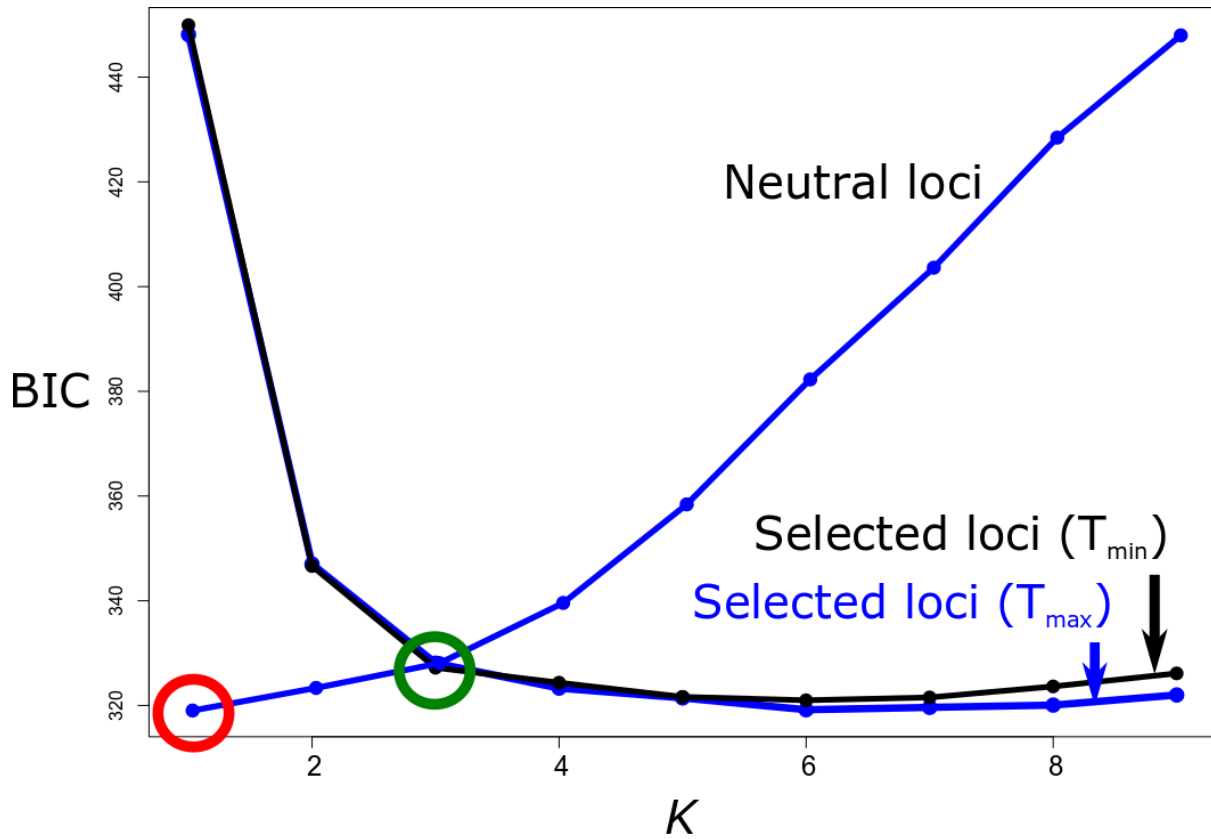

175  
176  
177  
178  
179  
180  
181  
182  
183  
184  
185  
186  
187

**Fig S2.** Analyses of candidate loci putatively under thermal selection and selectively neutral loci. The best value of  $K$  for selectively neutral data is based on the lowest Bayesian Information Criterion (BIC) value (red circle), whereas plots for temperature-associated loci (controlling for geographical distance) for minimum and maximum temperatures ( $T_{\min}$  and  $T_{\max}$ , respectively) have a distinct 'elbow' at  $K = 3$  beyond which further decrease in BIC is minimal (green circle). Some subsequent analyses were nonetheless conducted with 4 clusters to show differentiation between the pre-defined marine bioregions and to compare the results of DAPC analyses with those of the fastSTRUCTURE analyses.

188

189

190

191

192

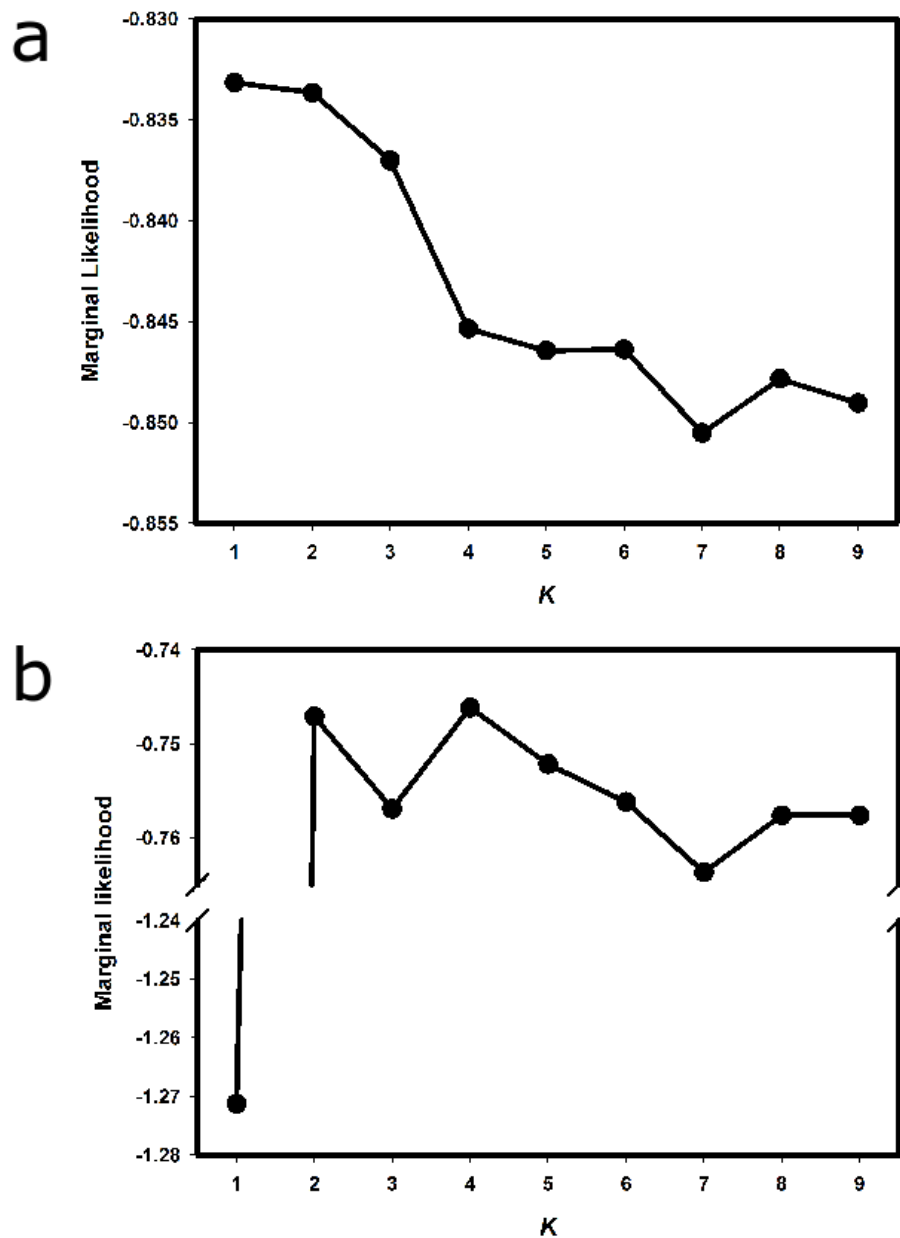

193

194

195 **Fig S3.** Support for number of clusters in fastStructure. Plots depict marginal  
196 likelihoods for number of genetic clusters ( $K$ ) for (a) neutral loci, highest likelihood at  
197  $K = 1$ ; (b) temperature-associated loci ( $T_{min}$ ), highest likelihood at  
198  $K = 4$ .

198

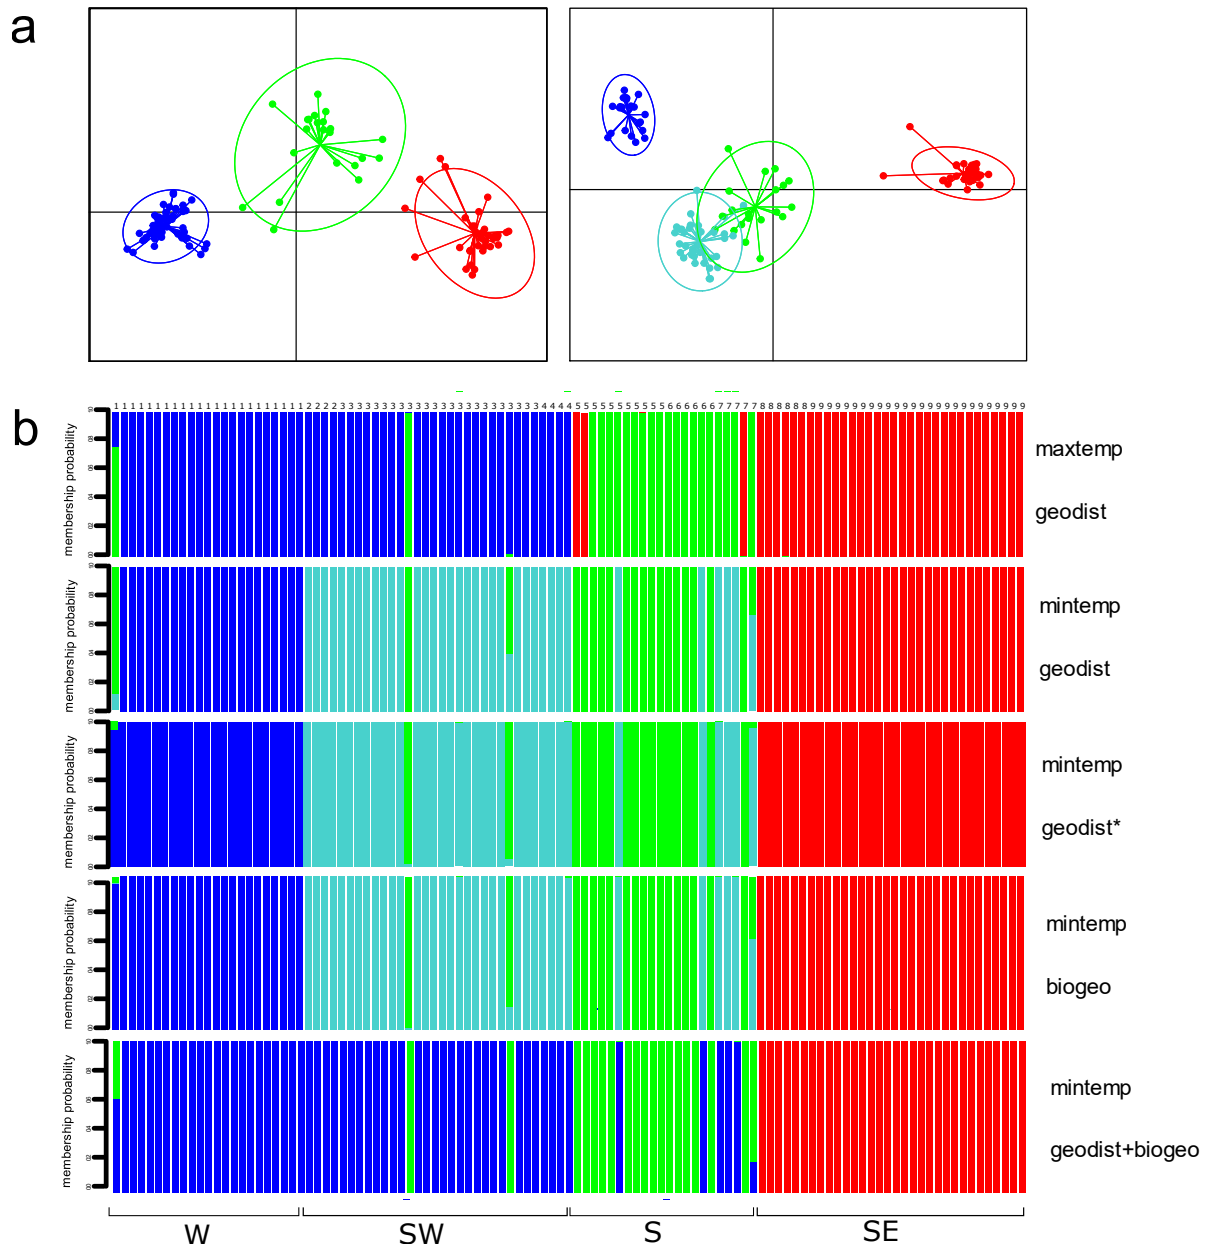

199  
 200  
 201  
 202  
 203  
 204  
 205  
 206  
 207  
 208  
 209  
 210  
 211

**Fig S4.** Population genetic structure inferred for temperature-associated loci using DAPC. **a** Scatterplots with inertia ellipses representing 95% confidence intervals, with colours reflecting the dominant bioregion represented in a particular cluster (left: loci correlated with maximum temperature; right: loci correlated with minimum temperature, in both cases controlling for geographic distance); **b** DAPC compoplots indicating membership probabilities for each individual (vertical bars) within one of four genetic clusters; correlation with temperature and the controlling factor are indicated on the right (maxtemp = maximum temperature, mintemp = minimum temperature, geodist = geographic distance, biogeo = biogeography; \*indicates that only sites 1, 8 and 9 were used to find loci correlated with minimum temperature).

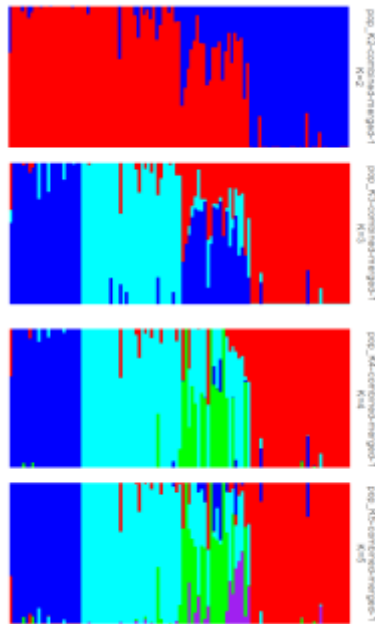

213

214

215 **Fig S5.** Comparison of consensus fastStructure barplots for  $K=2-5$  based on  
216 temperature-associated loci ( $T_{\min}$ ).

217

218

Table S1. Sampling sites, collection dates, number of high quality samples used for the analyses, and temperature data from nearby locations.

| Region | Site no. | Site name             | Date     | GPS coordinates                | N  | Temperature location* | min  | 5%   | 95%  | max  |
|--------|----------|-----------------------|----------|--------------------------------|----|-----------------------|------|------|------|------|
| W      | 1a       | Langebaan (Kraalbaai) | Feb 2016 | 33°08'31.32"S<br>18°01'26.26"E | 12 | Langebaan             | 11.9 | 12.1 | 19.6 | 20.2 |
| W      | 1b       | Langebaan (Shark Bay) | Dec 2016 | 33°06'42.42"S<br>18°02'24.47"E | 11 | Langebaan             | 11.9 | 12.1 | 19.6 | 20.2 |
| SW     | 2        | Rooiels               | Oct 2015 | 34°17'53.48"S<br>18°49'11.10"E | 4  | Betty's Bay           | 12.9 | 13.0 | 18.2 | 18.6 |
| SW     | 3        | Palmiet               | Dec 2016 | 34°20'36.33"S<br>18°59'39.57"E | 23 | Betty's Bay           | 12.9 | 13.0 | 18.2 | 18.6 |
| SW     | 4        | Klein                 | Dec 2016 | 34°25'08.06"S<br>19°18'23.78"E | 4  | Hermanus              | 12.2 | 13.6 | 19.1 | 19.9 |
| S      | 5        | Breede                | Dec 2016 | 34°23'47.19"S<br>20°50'32.45"E | 11 | Stilbaai              | 12.8 | 13.0 | 23.5 | 23.9 |
| S      | 6        | Klein Brak            | Oct 2015 | 34°05'29.82"S<br>22°08'45.12"E | 6  | Mossel Bay            | 12.9 | 13.7 | 23.4 | 23.8 |
| S      | 7        | Swartkops             | Oct 2015 | 33°52'09.06"S<br>25°37'43.13"E | 6  | Humewood              | 13.7 | 14.4 | 22.3 | 22.5 |
| SE     | 8        | Nenga                 | Oct 2015 | 31°59'02.81"S<br>29°09'03.83"E | 6  | Cwebe                 | 16.9 | 17.0 | 21.6 | 21.7 |
| SE     | 9a       | Bulolo                | Oct 2015 | 31°39'02.05"S<br>29°30'59.14"E | 6  | Mzamba                | 18.3 | 18.6 | 24.0 | 24.1 |
| SE     | 9b       | Bulolo                | May 2016 | 31°39'02.05"S<br>29°30'59.14"E | 20 | Mzamba                | 18.3 | 18.6 | 24.0 | 24.1 |

\*Smit et al. 2013; min = minimum temperature reading; 5% = coldest 5% of temperature readings; 95% = warmest 5% of temperature readings; max = maximum temperature reading.

Table S2. Genes identified among temperature-associated loci whose activity may be directly related to temperature stress. Loci marked with an asterisk were found for  $T_{\min}$  only, those without asterisk for both  $T_{\min}$  and  $T_{\max}$ .

| <b>Locus</b>  | <b>Uniprot</b>   | <b>Gene</b>          | <b>Temperature related activity</b>                                                                                                                                                                                                                                                           |
|---------------|------------------|----------------------|-----------------------------------------------------------------------------------------------------------------------------------------------------------------------------------------------------------------------------------------------------------------------------------------------|
| Contig_69368  | A0A1S3GQV0_DIPOR | Histone H3           | Biotinylation of Histone H3 is related resistance to heat stress in flies[37]. Related with control of expression of other proteins.                                                                                                                                                          |
| Contig_56520  | F1QC71_DANRE     | ANO5b                | Part of a family of proteins (Anoctamin) that are key mediators of thermal sensing, most do not act as temperature sensors themselves but rather support the behavior in some other capacity, such as by controlling the development or function of the thermo-sensory cell or circuitry[38]. |
| Contig_22921* | A0A1A8EID4_9TELE | SHC4                 | Moderate heat stress has been shown to induce maximal gene activity to promote tissue repair[39]. The gene was also indicative of adaptation to different thermal environments in <i>Anolis</i> lizards[40].                                                                                  |
| Contig_247440 | G3TCM9_LOXAF     | MBD2                 | Regulates the expression of other genes during heat stress in sea cucumbers[41].                                                                                                                                                                                                              |
| Contig_168847 | A0A147A7G3_FUNHE | 14-3-3 protein gamma | Part of a protein family that has been associated with heat shock responses in gobies[42]. Increased expression in cows exposed to high temperatures, possibly to protect against liver cell apoptosis[43]. Differential expression in corals in response to a thermal challenge[44].         |

|                |                  |                                            |                                                                                                                                                                                                                                                                                               |
|----------------|------------------|--------------------------------------------|-----------------------------------------------------------------------------------------------------------------------------------------------------------------------------------------------------------------------------------------------------------------------------------------------|
| Contig_38433   | A0A0F8AG31_LARCR | EH28_02053<br>(Tyrosine-protein<br>kinase) | Interacts with Hsp90[45] and its activity increases during heat stress in a goby species[42]. Altered gene expression in response to heat stress was also recorded in the Antarctic fish <i>Trematomus bernacchii</i> [46].                                                                   |
| Contig_93683   | A0A1A8MJC6_9TELE | PRSS12                                     | Expressed under heat stress condition in sea cucumbers[41].                                                                                                                                                                                                                                   |
| Contig_330391  | A0A146TQG3_FUNHE | Reverse transcriptase-like protein         | Upregulated as early response to heat shock in plants[47].                                                                                                                                                                                                                                    |
| Contig_351821* | S7PGQ6_MYOBR     | Tubulin beta chain                         | Divergence on tubulin genes has been associated to adaptation to cold temperatures in Antarctic fishes[48] and protozoans[49]. It also changes expression levels during thermal acclimation in bluefin tuna[50] and is differentially expressed in response to heat shock in crustaceans[51]. |

---

221

222

Table S3. Number of loci identified for gINLAnd analyses.

| Temperature | Controlling factor                    | No. loci |
|-------------|---------------------------------------|----------|
| Maximum     | Geographic distance                   | 175      |
| Minimum     | Geographic distance                   | 226      |
| Minimum     | Geographic distance*                  | 196      |
| Minimum     | Biogeography                          | 239      |
| Minimum     | Geographic distance +<br>Biogeography | 169      |

\*Only individuals from the W coast (1) and SE coast (8, 9) were included.

223

224

225

226



Table S4. Summary of loci obtained following raw data processing.

| Region | Loci present with less than 20% missing data | Variable loci | Percentage of variable loci | $H_O$  | $H_E$  | Genotyped samples |
|--------|----------------------------------------------|---------------|-----------------------------|--------|--------|-------------------|
| W      | 8532                                         | 4122          | 48.3                        | 0.2834 | 0.2703 | 23                |
| SW     | 8532                                         | 4206          | 49.3                        | 0.2849 | 0.2710 | 31                |
| S      | 8532                                         | 4288          | 50.3                        | 0.2592 | 0.2855 | 23                |
| SE     | 8532                                         | 4251          | 49.8                        | 0.2659 | 0.2628 | 32                |

## 231 Supplementary references

- 232 1. Griffiths CL, Robinson TB, Lange L, Mead A. 2010 Marine biodiversity in South  
233 Africa: an evaluation of current states of knowledge. *PLoS ONE* **5**, e12008.
- 234 2. Awad AA, Griffiths CL, Turpie JK. 2002 Distribution of South African marine  
235 benthic invertebrates applied to the selection of priority conservation areas.  
236 *Divers. Distrib.* **8**, 129–145. (doi:10.1046/j.1472-4642.2002.00132.x)
- 237 3. Teske PR, Von der Heyden S, McQuaid CD, Barker NP. 2011 A review of  
238 marine phylogeography in southern Africa. *South Afr. J. Sci.* **107**, 1–11.  
239 (doi:10.4102/sajs.v107i5/6.514)
- 240 4. Qhaji Y, van Vuuren BJ, Papadopoulos I, McQuaid CD, Teske PR. 2015 A  
241 comparison of genetic structure in two low-dispersal crabs from the Wild Coast,  
242 South Africa. *Afr. J. Mar. Sci.* **37**. (doi:10.2989/1814232X.2015.1077474)
- 243 5. Teske PR, Papadopoulos I, Zardi GI, McQuaid CD, Edkins MT, Griffiths CL,  
244 Barker NP. 2007 Implications of life history for genetic structure and migration  
245 rates of southern African coastal invertebrates: Planktonic, abbreviated and  
246 direct development. *Mar. Biol.* **152**, 697–711. (doi:10.1007/s00227-007-0724-y)
- 247 6. Branch GM. 1984 Changes in intertidal and shallow-water communities of the  
248 south and west coasts of South Africa during the 1982/1983 temperature  
249 anomaly. *South Afr. J. Sci.* **80**, 61–65.
- 250 7. Beckley LE. 1986 The ichthyoplankton assemblage of the Algoa Bay nearshore  
251 region in relation to coastal zone utilization by juvenile fish. *South Afr. J. Zool.*  
252 **21**, 244–252.
- 253 8. Teske PR, Papadopoulos I, Newman BK, Dworschak PC, McQuaid CD, Barker  
254 NP. 2008 Oceanic dispersal barriers, adaptation and larval retention: an  
255 interdisciplinary assessment of potential factors maintaining a phylogeographic  
256 break between sister lineages of an African prawn. *BMC Evol. Biol.* **8**, 341.  
257 (doi:10.1186/1471-2148-8-341)
- 258 9. Papadopoulos I, Teske PR. 2014 Larval development reflects biogeography in  
259 two formerly synonymised southern African coastal crabs. *Afr. J. Aquat. Sci.* **39**.  
260 (doi:10.2989/16085914.2014.938600)
- 261 10. Strydom NA. 2015 Patterns in larval fish diversity, abundance, and distribution  
262 in temperate South African estuaries. *Estuaries Coasts* **38**, 268–284.  
263 (doi:10.1007/s12237-014-9801-x)
- 264 11. Kruger M, Strydom NA. 2010 Spatial and temporal variability in the larval fish  
265 assemblage of a warm temperate South African estuary, with notes on the  
266 effects of artificial channelling. *Afr. Zool.* **45**.

- 267 12. Beckley LE. 1985 Tidal exchange of ichthyoplankton in the Swartkops estuary  
268 mouth, South Africa. *Afr. Zool.* **20**, 15–20–20.
- 269 13. Whitfield AK. 1989 Ichthyoplankton in a southern african surf zone: Nursery  
270 area for the postlarvae of estuarine associated fish species? *Estuar. Coast.*  
271 *Shelf Sci.* **29**, 533–547. (doi:10.1016/0272-7714(89)90009-7)
- 272 14. Sponaugle S, Cowen RK. 1994 Larval durations and recruitment patterns of two  
273 Caribbean gobies (Gobiidae): contrasting early life histories in demersal  
274 spawners. *Mar. Biol.* **120**, 133–143. (doi:10.1007/BF00381949)
- 275 15. Beldade R, Pedro T, Gonçalves EJ. 2007 Pelagic larval duration of 10  
276 temperate cryptobenthic fishes. *J. Fish Biol.* **71**, 376–382. (doi:10.1111/j.1095-  
277 8649.2007.01491.x)
- 278 16. Doyle J. 1991 CTAB Total DNA Isolation. In *Molecular Techniques in*  
279 *Taxonomy*, pp. 283–293. (doi:10.1007/978-3-642-83962-7\_18)
- 280 17. Drost E, Golla TR, Heyden S von der, Teske PR. 2016 No divergent evolution,  
281 despite restricted connectivity, between Atlantic and Indian Ocean goby  
282 populations. *Mar. Biodivers.* **46**, 465–471. (doi:10.1007/s12526-015-0389-6)
- 283 18. Catchen JM, Amores A, Hohenlohe P, Cresko W, Postlethwait JH, De Koning  
284 D-J. 2011 Stacks: building and genotyping loci de novo from short-read  
285 sequences. *Genes|Genomes|Genetics* **1**, 171–182.  
286 (doi:10.1534/g3.111.000240)
- 287 19. Catchen J, Hohenlohe PA, Bassham S, Amores A, Cresko WA. 2013 Stacks:  
288 An analysis tool set for population genomics. *Mol. Ecol.* **22**, 3124–3140.  
289 (doi:10.1111/mec.12354)
- 290 20. Puritz JB, Hollenbeck CM, Gold JR. 2014 dDocent: a RADseq, variant-calling  
291 pipeline designed for population genomics of non-model organisms. *PeerJ* **2**,  
292 e431. (doi:10.7717/peerj.431)
- 293 21. Garrison E, Marth G. 2012 Haplotype-based variant detection from short-read  
294 sequencing. *ArXiv Prepr. ArXiv12073907*, 9. (doi:arXiv:1207.3907 [q-bio.GN])
- 295 22. Guillot G, Vitalis R, le Rouzic A, Gautier M. 2014 Detecting correlation between  
296 allele frequencies and environmental variables as a signature of selection. A  
297 fast computational approach for genome-wide studies. *Spat. Stat.* **8**, 145–155.  
298 (doi:10.1016/j.spasta.2013.08.001)
- 299 23. Foll M, Gaggiotti O. 2008 A genome-scan method to identify selected loci  
300 appropriate for both dominant and codominant markers: A Bayesian  
301 perspective. *Genetics* **180**, 977–993. (doi:10.1534/genetics.108.092221)
- 302 24. Forester BR, Lasky JR, Wagner HH, Urban DL. 2018 Comparing methods for  
303 detecting multilocus adaptation with multivariate genotype–environment  
304 associations. *Mol. Ecol.* **27**, 2215–2233. (doi:10.1111/mec.14584)
- 305 25. Kass RE, Raferty AE. 1995 Bayes factors. *J. Am. Stat. Soc.* **90**, 773–795.

- 306 26. Venables WN, Ripley BD. 2002 *Modern applied statistics with S*. 4th editio. New  
307 York: Springer. (doi:10.1198/tech.2003.s33)
- 308 27. Narum SR, Hess JE. 2011 Comparison of Fst outlier tests for SNP loci under  
309 selection. *Mol. Ecol. Resour.* **11 Suppl 1**, 184–194. (doi:10.1111/j.1755-  
310 0998.2011.02987.x)
- 311 28. Smit AJ, Roberts M, Anderson RJ, Dufois F, Dudley SFJ, Bornman TG, Olbers  
312 J, Bolton JJ. 2013 A coastal seawater temperature dataset for biogeographical  
313 studies: large biases between in situ and remotely-sensed data sets around the  
314 coast of South Africa. *PLoS ONE* **8**, e81944.  
315 (doi:10.1371/journal.pone.0081944)
- 316 29. Harrison TD. 2004 Physico-chemical characteristics of South African estuaries  
317 in relation to the zoogeography of the region. *Estuar. Coast. Shelf Sci.* **61**, 73–  
318 87. (doi:10.1016/j.ecss.2004.04.005)
- 319 30. Elliott M, Quintino V. 2007 The estuarine quality paradox, environmental  
320 homeostasis and the difficulty of detecting anthropogenic stress in naturally  
321 stressed areas. *Mar. Pollut. Bull.* **54**, 640–645.  
322 (doi:10.1016/j.marpolbul.2007.02.003)
- 323 31. Madeira D, Narciso L, Cabral HN, Vinagre C. 2012 Thermal tolerance and  
324 potential impacts of climate change on coastal and estuarine organisms. *J. Sea  
325 Res.* **70**, 32–41. (doi:10.1016/j.seares.2012.03.002)
- 326 32. Killen SS, Costa I, Brown JA, Gamperl AK. 2007 Little left in the tank: metabolic  
327 scaling in marine teleosts and its implications for aerobic scope. *Proc. R. Soc. B  
328 Biol. Sci.* **274**, 431–438. (doi:10.1098/rspb.2006.3741)
- 329 33. Jombart T, Ahmed I. 2011 adegenet 1.3-1: New tools for the analysis of  
330 genome-wide SNP data. *Bioinformatics* **27**, 3070–3071.  
331 (doi:10.1093/bioinformatics/btr521)
- 332 34. Knaapen JP, Scheffer M, Harms B. 1992 Estimating habitat isolation in  
333 landscape planning. *Landsc. Urban Plan.* **23**, 1–16. (doi:10.1016/0169-  
334 2046(92)90060-D)
- 335 35. Rosenberg NA. 2004 distruct: a program for the graphical display of population  
336 structure. *Mol. Ecol. Notes* **4**, 137–138. (doi:10.1046/j.1471-8286.2003.00566.x)
- 337 36. Stephens M, Smith NJ, Donnelly P. 2001 A New Statistical Method for  
338 Haplotype Reconstruction from Population Data. *Am. J. Hum. Genet.* **68**, 978–  
339 989.
- 340 37. Smith EM, Hoi JT, Eissenberg JC, Shoemaker JD, Neckameyer WS, Ilvarsonn  
341 AM, Harshman LG, Schlegel VL, Zemleni J. 2007 Feeding *Drosophila* a biotin-  
342 deficient diet for multiple generations increases stress resistance and lifespan  
343 and alters gene expression and histone biotinylation patterns 1,. *J. Nutr.* **137**,  
344 2006–2012.

- 345 38. Sengupta P, Garrity P. 2013 Sensing temperature. *Curr. Biol. CB* **23**, R304–  
346 R307. (doi:10.1016/j.cub.2013.03.009)
- 347 39. Park HG, Han SI, Oh SY, Kang HS. 2005 Cellular responses to mild heat  
348 stress. *Cell. Mol. Life Sci. CMLS* **62**, 10–23. (doi:10.1007/s00018-004-4208-7)
- 349 40. Akashi HD, Díaz AC, Shigenobu S, Makino T, Kawata M. 2016 Differentially  
350 expressed genes associated with adaptation to different thermal environments  
351 in three sympatric Cuban *Anolis* lizards. *Mol. Ecol.* **25**, 2273–2285.  
352 (doi:10.1111/mec.13625)
- 353 41. Zhao H, Yang H, Zhao H, Chen M, Liu S. 2011 Heat stress-mediated gene  
354 expression in the body wall of the Japanese sea cucumber *Apostichopus*  
355 *japonicus*. *Aquat. Biol.* **12**, 23–31. (doi:10.3354/ab00315)
- 356 42. Buckley BA, Gracey AY, Somero GN. 2006 The cellular response to heat stress  
357 in the goby *Gillichthys mirabilis*: a cDNA microarray and protein-level analysis.  
358 *J. Exp. Biol.* **209**, 2660–2677. (doi:10.1242/jeb.02292)
- 359 43. Wang Q, Zhao X, Zhang Z, Zhao H, Huang D, Cheng G, Yang Y. 2017  
360 Proteomic analysis of physiological function response to hot summer in liver  
361 from lactating dairy cows. *J. Therm. Biol.* **65**, 82–87.  
362 (doi:10.1016/j.jtherbio.2017.02.010)
- 363 44. Bellantuono AJ, Granados-Cifuentes C, Miller DJ, Hoegh-Guldberg O,  
364 Rodriguez-Lanetty M. 2012 Coral thermal tolerance: tuning gene expression to  
365 resist thermal stress. *PLoS One* **7**, e50685. (doi:10.1371/journal.pone.0050685)
- 366 45. Dougherty JJ, Rabideau DA, Iannotti AM, Sullivan WP, Toft DO. 1987  
367 Identification of the 90 kDa substrate of rat liver type II casein kinase with the  
368 heat shock protein which binds steroid receptors. *Biochim. Biophys. Acta BBA -*  
369 *Mol. Cell Res.* **927**, 74–80. (doi:10.1016/0167-4889(87)90067-X)
- 370 46. Buckley BA, Somero GN. 2009 cDNA microarray analysis reveals the capacity  
371 of the cold-adapted Antarctic fish *Trematomus bernacchii* to alter gene  
372 expression in response to heat stress. *Polar Biol.* **32**, 403–415.  
373 (doi:10.1007/s00300-008-0533-x)
- 374 47. Izadi F, Zarrini HN, Kiani G, Jelodar NB. 2017 Data mining approaches  
375 highlighted transcription factors that play role in thermo-priming. *Plant Omics*  
376 **10**, 139–145.
- 377 48. Detrich HW, Parker SK. 1993 Divergent neural  $\beta$  tubulin from the Antarctic fish  
378 *Notothenia coriiceps neglecta*: potential sequence contributions to cold  
379 adaptation of microtubule assembly. *Cytoskeleton* **24**, 156–166.  
380 (doi:10.1002/cm.970240303)
- 381 49. Chiappori F, Pucciarelli S, Merelli I, Ballarini P, Miceli C, Milanese L. 2011  
382 Structural thermal adaptation of  $\beta$ -tubulins from the Antarctic psychrophilic  
383 protozoan *Euplotes focardii*. *Proteins Struct. Funct. Bioinforma.* **80**, 1154–1166.  
384 (doi:10.1002/prot.24016)

- 385 50. Castilho PC, Buckley BA, Somero G, Block BA. 2009 Heterologous  
386 hybridization to a complementary DNA microarray reveals the effect of thermal  
387 acclimation in the endothermic bluefin tuna (*Thunnus orientalis*). *Mol. Ecol.* **18**,  
388 2092–2102. (doi:10.1111/j.1365-294X.2009.04174.x)
- 389 51. Bedulina D, Meyer MF, Gurkov A, Kondratjeva E, Baduev B, Gusdorf R,  
390 Timofeyev MA. 2017 Intersexual differences of heat shock response between  
391 two amphipods (*Eulimnogammarus verrucosus* and *Eulimnogammarus*  
392 *cyaneus*) in Lake Baikal. *PeerJ* **5**, e2864. (doi:10.7717/peerj.2864)

393
